# Supplementary material for: Evaluation of red blood cell parameters provided by the UF-5000 urine auto-analyzer in patients with glomerulonephritis
Source: publisher site journal article supplement (doi:10.1515/cclm-2021-0287), 2021-04-28
Supplement: Supplementary file 1 [file j_cclm-2021-0287_suppl_001.docx]

| Supplemental Table 1. The diseases distribution of glomerulonephritis and non-glomerulonephritis groups | | | | | | |
| --- | --- | --- | --- | --- | --- | --- |
| Glomerulonephritis | n | % |  | Non-glomerulonephritis | n | % |
| IgA nephropathy | 31 | 26.1 |  | Autoimmune disease | 9 | 10.7 |
| Lupus nephritis | 22 | 18.5 |  | Bladder carcinoma | 6 | 7.1 |
| Nephrotic syndrome | 19 | 16.0 |  | Prostatic carcinoma | 3 | 3.6 |
| Acute glomerulonephritis | 7 | 5.9 |  | Polycystic kidney disease | 3 | 3.6 |
| Chronic glomerulonephritis | 14 | 11.8 |  | Ureteral stone | 2 | 2.4 |
| Chronic renal failure | 8 | 6.7 |  | Other-unrelated diseases | 61 | 72.6 |
| Chronic kidney disease | 8 | 6.7 |  |  |  |  |
| Other glomerulonephritis | 10 | 8.4 |  |  |  |  |
